# Supplementary material for: Efficient calculation of protein–ligand binding free energy using GFN methods: the power of the cluster model
Source: Royal Society of Chemistry journal article supplement (doi:10.1039/d2cp00161f), 2022-01-01
Supplement: d2cp00161f2.pdf [file d2cp00161f2.pdf]

**Supporting Information for**  
**Efficient calculation of protein-ligand binding free energy**  
**with GFN methods: the power of cluster model**

Yuan-qiang Chen,<sup>1</sup> Yan-jing Sheng,<sup>1</sup> Yu-qiang Ma,<sup>2</sup> and Hong-ming Ding<sup>1\*</sup>

<sup>1</sup> Center for Soft Condensed Matter Physics and Interdisciplinary Research, School of Physical Science and Technology, Soochow University, Suzhou 215006, China.

<sup>2</sup> National Laboratory of Solid State Microstructures and Department of Physics, Collaborative Innovation Center of Advanced Microstructures, Nanjing University, Nanjing 210093, China.

\*Email: dinghm@suda.edu.cn

**Table S1.** The PDB entries, the net charge of protein and ligand, the experimental  $pK_d$  ( $pK_d = -\log K_d$ ) and the descriptions of the complexes.

| ID | PDB  | $pK_d$ | Charge(Pro/Lig) | Descriptions                                                                      |
|----|------|--------|-----------------|-----------------------------------------------------------------------------------|
| 1  | 186L | 4.85   | +8/0            | Enterobacteria phage T4 LYSOZYME / N4B                                            |
| 2  | 188L | 3.33   | +8/0            | Enterobacteria phage T4 LYSOZYME / OXE                                            |
| 3  | 1A28 | 8.29   | +1/0            | ligand-binding domain of the human progesterone receptor / STR                    |
| 4  | 1A52 | 9.86   | -7/0            | human estrogen receptor alpha ligand-binding domain / EST                         |
| 5  | 1AU0 | 7.66   | +7/0            | cathepsin k / SDK                                                                 |
| 6  | 1BCU | 3.28   | +7/0            | thrombin alpha / PRL                                                              |
| 7  | 1CEA | 4.96   | 0/0             | Plasminogen / ACA                                                                 |
| 8  | 1CEB | 6      | 0/0             | Plasminogen / AMH                                                                 |
| 9  | 1CTU | 11.92  | -9/0            | cytidine deaminase / ZEB                                                          |
| 10 | 1D2S | 9.74   | -6/0            | N-terminal laminin G-like domain of human sex hormone-binding globulin / DHT      |
| 11 | 1D7I | 3.6    | +1/0            | FK506 binding protein / DSS                                                       |
| 12 | 1D7J | 3.3    | +1/0            | FK506 binding protein / BUQ                                                       |
| 13 | 1DRK | 6.82   | -2/0            | rous sarcoma virus protease / RIP                                                 |
| 14 | 1E02 | 6.15   | -16/0           | odorant-binding protein / UNA                                                     |
| 15 | 1E3G | 9      | +5/0            | Ligand-binding Domain (LBD) of human Androgen Receptor / R18                      |
| 16 | 1ERB | 8.1    | -4/0            | retinoic acid receptor rxr-alpha / ETR                                            |
| 17 | 1FKH | 8.15   | +1/0            | FK506 binding protein / SBX                                                       |
| 18 | 1G50 | 6.28   | -6/0            | wildtype human estrogen receptor alpha ligand-binding domain (hERalpha LBD) / EST |
| 19 | 1G85 | 5.48   | -10/0           | odorant-binding protein / 3OL                                                     |
| 20 | 1GX8 | 6.37   | -8/0            | bovine beta-lactoglobulin / RTL                                                   |
| 21 | 1J01 | 6.47   | -8/0            | xylanase beta-1,4 / XIL                                                           |
| 22 | 1JAQ | 4.48   | -12/0           | matrix metalloproteinase-8 / 01S                                                  |

|    |      |         |       |                                                                              |
|----|------|---------|-------|------------------------------------------------------------------------------|
| 23 | 1KDK | 9.05    | -5/0  | sex hormone-binding globulin / DHT                                           |
| 24 | 1KMY | 5.1     | -10/0 | 2,3-dihydroxybiphenyl-1,2-dioxygenase / BPY                                  |
| 25 | 1L83 | 3.4     | +8/0  | lysozyme C54T C97A L99A / BNZ                                                |
| 26 | 1LHU | 8.83    | -4/0  | N-terminal laminin G-like domain of human sex hormone-binding globulin / EST |
| 27 | 1LI2 | 4.04    | +8/0  | Lysozyme / IPH                                                               |
| 28 | 1LKE | 7.52    | -4/0  | diga16 / DOG                                                                 |
| 29 | 1OGZ | 5.85    | -4/0  | STEROID DELTA-ISOMERASE(P39A) / EQU                                          |
| 30 | 1QKU | 9.59    | -6/0  | ESTRADIOL RECEPTOR/ EST                                                      |
| 31 | 1RBP | 6.72    | -4/0  | retinoic acid receptor rxr-alpha / RTL                                       |
| 32 | 1RDL | 2.24    | -1/0  | mannose-binding protein-c / MMA                                              |
| 33 | 1W6Y | 5.36    | -7/0  | steroid delta-isomerase / EQU                                                |
| 34 | 2A2G | 7       | -5/0  | alpha-2u-globulin / LEO                                                      |
| 35 | 2E2R | 8.25964 | -11/0 | human estrogen-related receptor c (ERR $\gamma$ ) / 2OH                      |
| 36 | 2I0G | 9.72    | -4/0  | estrogen receptor beta / I0G                                                 |
| 37 | 2QE4 | 7.96    | -6/0  | Estrogen receptor / JJ3                                                      |
| 38 | 2XAB | 9.27    | -8/0  | HSP90 / VHD                                                                  |
| 39 | 2XHT | 5.96    | -11/0 | HSP90 / C0Y                                                                  |
| 40 | 3EKO | 6.69897 | -11/0 | Hsp90 Thr184 / PYU                                                           |
| 41 | 3KGT | 5.51    | -5/0  | V30M mutant human transthyretin (TTR) / GEN                                  |
| 42 | 4HBV | 4.64    | +2/0  | Bromodomain-containing protein 4 / 15E                                       |
| 43 | 4MRE | 2.19    | -4/0  | murine cd44 hyaluronan binding domain / 2C9                                  |
| 44 | 4O09 | 7.7     | -7/0  | Heat shock protein HSP 90-alpha / 2R6                                        |
| 45 | 4QEV | 7.66    | +1/0  | Bromodomain-containing protein 2, BRD2(BD2) L383A mutant / 31O               |
| 46 | 4QF7 | 8.6     | +4/0  | Phospholipase A2 VRV-PL-VIIIa / C0R                                          |
| 47 | 4STD | 10.33   | -4/0  | scytalone dehydratase / BFS                                                  |

|    |      |       |        |                                                       |
|----|------|-------|--------|-------------------------------------------------------|
| 48 | 5G2G | 6.05  | -5/0   | ketosteroid isomerase mutant M112K / EQU              |
| 49 | 6ELN | 6.05  | -7/0   | Heat shock protein HSP 90-alpha / P4A                 |
| 50 | 7STD | 10.72 | -4/0   | scytalone dehydratase / CRP                           |
| 51 | 1C4V | 10.8  | +6/+1  | thrombin alpha / IH2                                  |
| 52 | 1C5P | 4.68  | +6/+1  | trypsin beta / BEN                                    |
| 53 | 1CBR | 9.4   | -4/-1  | mouse cellular retinol-binding protein (CRBP-1) / REA |
| 54 | 1CE5 | 4.74  | +6/+1  | trypsin beta / BEN                                    |
| 55 | 1DB5 | 6.82  | +15/-1 | human non-pancreatic secretory phospholipase A2 / 6IN |
| 56 | 1DF8 | 9.7   | -1/-1  | Streptavidin / BTN                                    |
| 57 | 1EZQ | 9.05  | +1/+2  | coagulation factor xa / RPR                           |
| 58 | 1F0U | 7.16  | +6/+2  | trypsin beta / RPR                                    |
| 59 | 1FCY | 8.52  | -3/-1  | retinoic acid receptor gamma-1 / 564                  |
| 60 | 1FCZ | 9.22  | -3/-1  | retinoic acid receptor gamma-1 / 156                  |
| 61 | 1FIG | 6.22  | +4/-2  | antibody fab fragment / TSA                           |
| 62 | 1I2S | 3.31  | -8/-3  | beta-lactamase from Bacillus licheniformis BS3 / CIT  |
| 63 | 1LAH | 7.52  | -3/+1  | diga16 / ORN                                          |
| 64 | 1LPG | 7.09  | +1/+2  | coagulation factor xa / IMA                           |
| 65 | 1NF8 | 7.82  | -4/-2  | phenazine biosynthesis protein phzd / ISC             |
| 66 | 1O4M | 1.4   | +4/-2  | proto-oncogene tyrosine-protein kinase src / MLA      |
| 67 | 1O4P | 2.6   | +4/-2  | proto-oncogene tyrosine-protein kinase src / 791      |
| 68 | 1QB6 | 6.06  | +6/+2  | trypsin beta / 623                                    |
| 69 | 1TNG | 2.93  | +6/+1  | trypsin beta / AMC                                    |
| 70 | 1TOM | 8.3   | +7/+2  | thrombin alpha / MIN                                  |
| 71 | 1V2N | 5.9   | +5/+2  | trypsin beta / BBA                                    |
| 72 | 1XUG | 7.05  | +6/+3  | Trypsin / BAB                                         |
| 73 | 2BOK | 6.55  | -1/+3  | coagulation factor xa / 784                           |
| 74 | 2GKL | 5.35  | 0/-2   | zinc carbapenemase CPHA / PD2                         |

|    |      |         |        |                                                                                      |
|----|------|---------|--------|--------------------------------------------------------------------------------------|
| 75 | 2GTV | 5.15    | +1/-2  | chorismate mutase / TSA                                                              |
| 76 | 2J4A | 10.6    | -9/-1  | HUMAN THYROID HORMONE<br>RECEPTOR BETA LIGAND BINDING<br>DOMAIN / OEF                |
| 77 | 2V77 | 5.06048 | -6/-4  | human carboxypeptidase A1 (hCPA1) / PAY                                              |
| 78 | 2YG2 | 6.05    | -5/-3  | APOLIPOPROTEIN M / FLC                                                               |
| 79 | 2ZFS | 6.54    | +6/+2  | Cationic trypsin / 12U                                                               |
| 80 | 2ZFT | 6.52    | +6/+2  | Cationic trypsin / 10U                                                               |
| 81 | 3B3X | 3.6     | -8/-2  | class A beta-lactamase of Bacillus<br>licheniformis BS3 / A33                        |
| 82 | 3BU1 | 8.14874 | -3/+1  | AM-10, monomine / HSM                                                                |
| 83 | 3TVC | 7.74    | -10/-1 | Collagenase 3 / E3P                                                                  |
| 84 | 4BAQ | 9.01    | +7/+2  | THROMBIN / M4Z                                                                       |
| 85 | 4GGZ | 10.18   | +5/-1  | Bradavidin 2 / BTN                                                                   |
| 86 | 4M8H | 7.6     | -7/-1  | human Retinoic acid receptor RXR-alpha<br>ligand binding domain / R4M                |
| 87 | 4O9V | 8       | -6/+3  | Suppressor of tumorigenicity 14 protein<br>Matriptase catalytic domain complex / NT4 |
| 88 | 4QF8 | 7.51    | +4/+3  | Phospholipase A2 VRV-PL-VIIIa / SPD                                                  |
| 89 | 4RGD | 3.94    | +8/-3  | Bacteriocin AS-48 G13K/L40K mutant /<br>CIT                                          |
| 90 | 6GGD | 5.59    | +2/+1  | Cellular tumor antigen p53 / EYB                                                     |

---

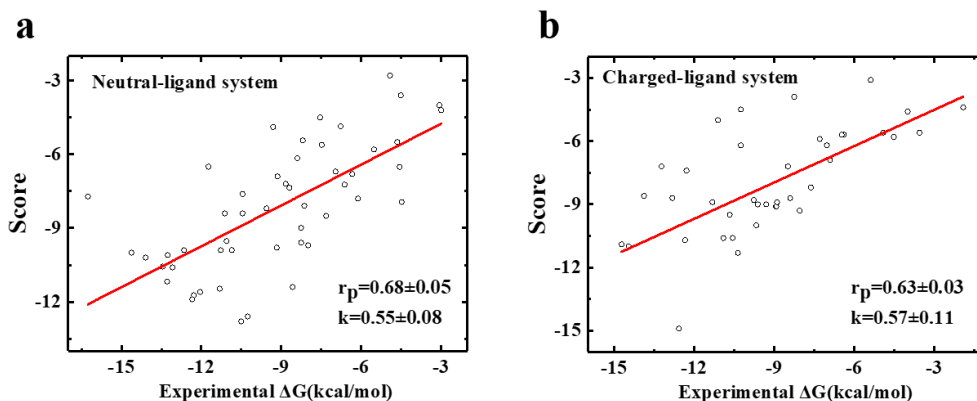

**Figure S1.** Correlation between experimental measurements and the docking score calculated by using the Autodock vina in (a) neutral-ligand system and (b) charged-ligand system. The uncertainties of  $r_p$  and  $k$  is estimated by the bootstrapping algorithm (i.e., randomly selecting 80% of each dataset with the repeat times equaling to the number of complexes in each dataset).

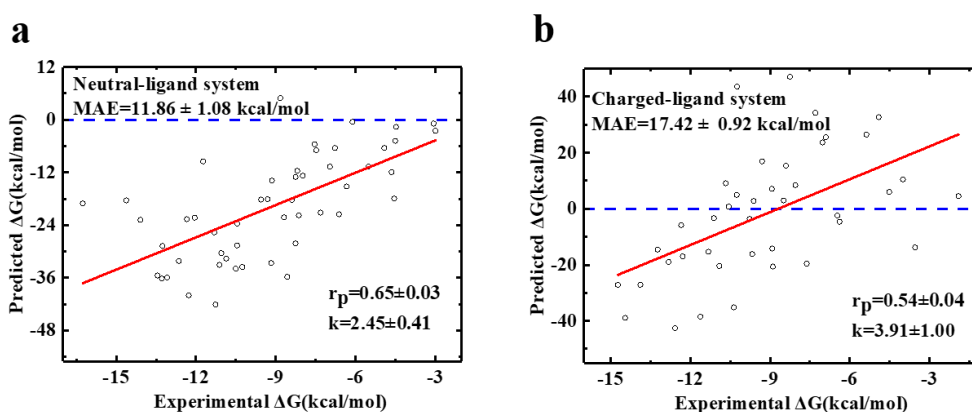

**Figure S2.** MAE and correlation between experimental and the predicted binding free energy with the MM/PBSA method in (a) neutral-ligand system and (b) charged-ligand system. The uncertainties of  $r_p$  and  $k$  is estimated by the bootstrapping algorithm (i.e., randomly selecting 80% of each dataset with the repeat times equaling to the number of complexes in each dataset).

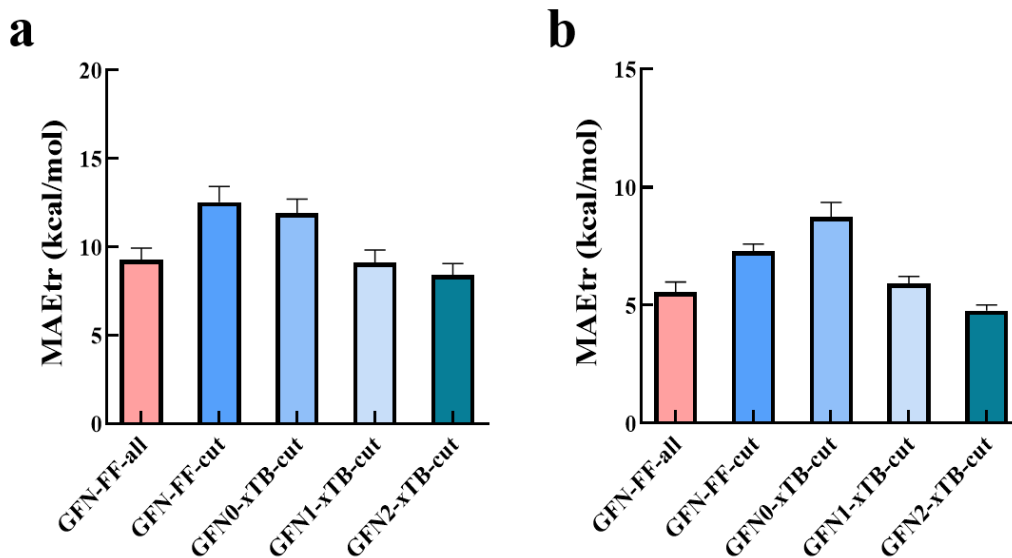

**Figure S3.** MAEtr for the binding free energy of the whole protein-ligand (calculated using GFN-FF method) and its cluster model (calculated using GFN0, GFN1, GFN2-xTB and GFN-FF methods), after the removal of the systematic error (mean signed error, MSE). (a) MAEtr value of the charged-ligand system; (b) MAEtr value of the neutral-ligand system.

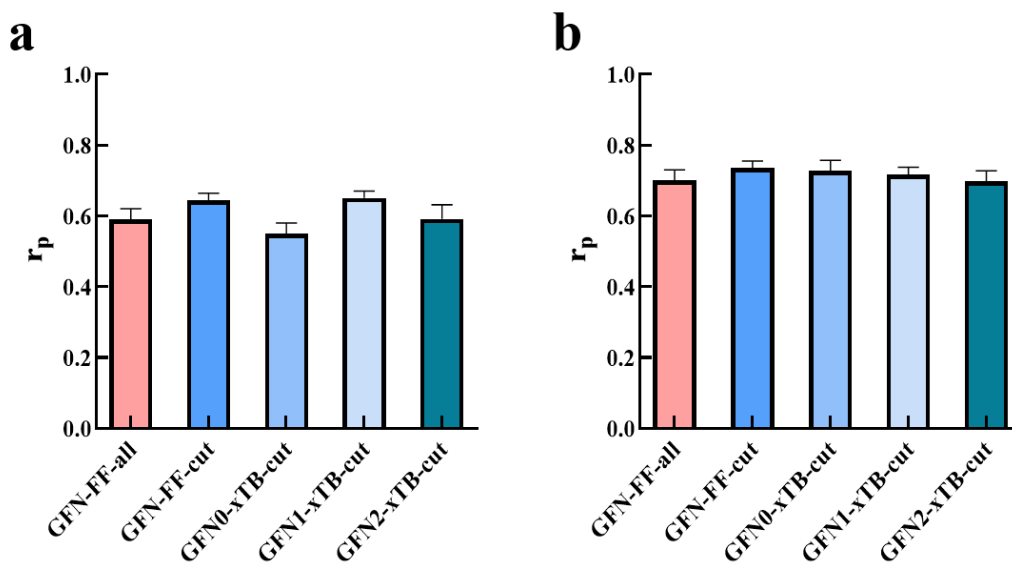

**Figure S4.** The Pearson correlation coefficients  $r_p$  of (a) the charged-ligand truncated systems and (b) the neutral-ligand truncated systems under different GFN methods.

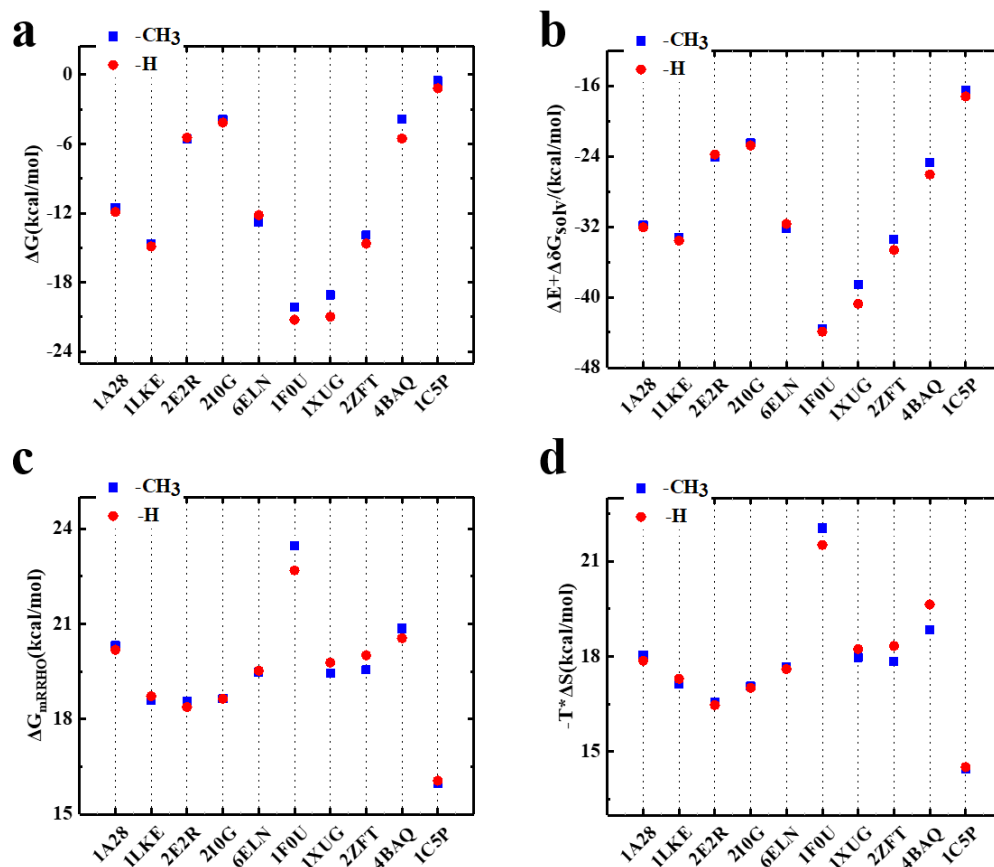

**Figure S5.** In the cluster model with the GFN2-xTB method, (a) association free energy ( $\Delta G$ ), (b) enthalpy changes ( $\Delta E + \Delta \delta G_{\text{solv}}$ ), (c) thermostatical corrections of free energy ( $\Delta G_{\text{mRRHO}}$ ) and (d) entropy changes ( $-T^* \Delta S$ ) of ten protein-ligand systems using different truncated methods (hydrogen atoms and methyl groups).



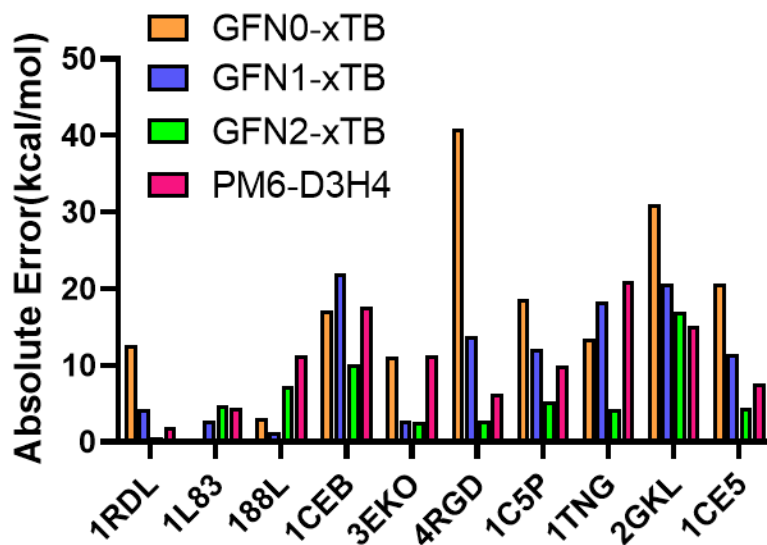

**Figure S6.** Absolute error (i.e.,  $|\Delta G_{\text{exp}} - \Delta G_{\text{cal}}|$ ) for the binding free energy of the truncated systems with the PM6-D3H4 and GFN $n$ -xTB methods.
